# Supplementary material for: Thienopyrrolyl dione end-capped oligothiophene ambipolar semiconductors for thin film- and light emitting transistors
Source: Royal Society of Chemistry journal article supplement (doi:10.1039/c1cc14179a), 2011-01-01
Supplement: c1cc14179a.doc [file c1cc14179a.doc]

**Supporting Information**

**Contents:**

**1. Synthesis**

**2. Cyclic Voltammetries**

**3. Differential Scanning Calorimetry**

**4. Hot stage Polarized Microscopy**

**5. XR crystallography**

**6. AFM**

**7. Thin Film XR diffraction**

**8. Device fabrication**

**9. Photocurrent generation**

**1. Synthesis**

**
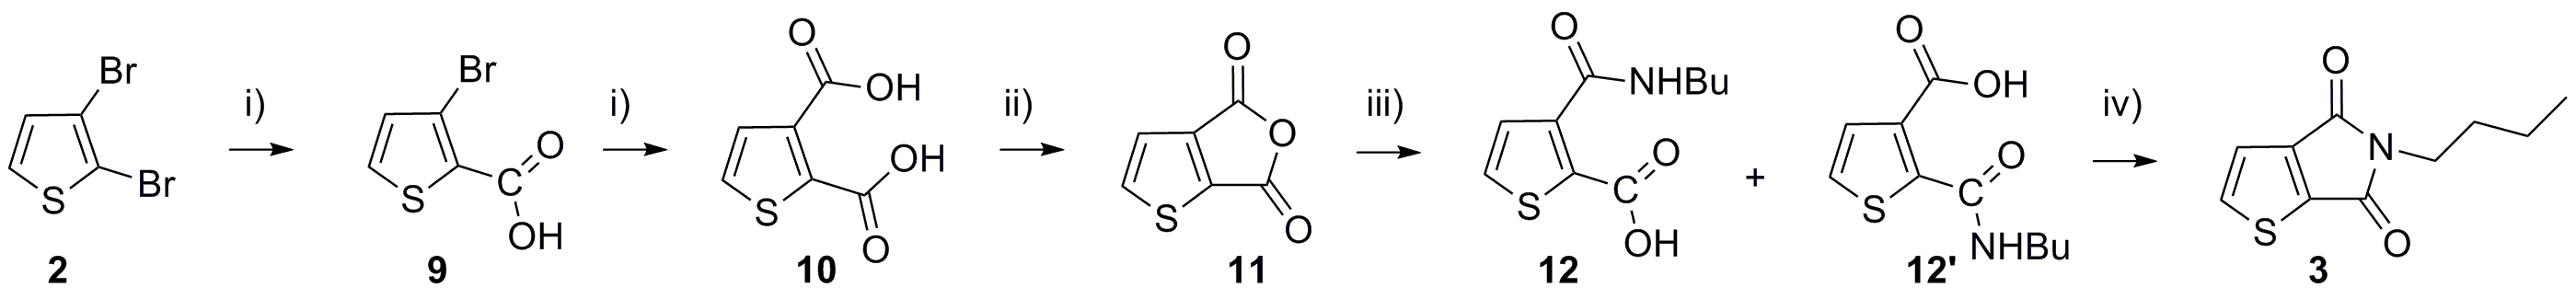
**

**Scheme SI_1.** Synthetic route to key thienopyrrolyl building block **3**. i) BuLi, CO2gas, Et2O, ii) acetic anhydride, reflux, iii) buthylamine, toluene, reflux, iv) SOCl2, reflux.

**General.** *2,3-dibromothiophene* **2**, and*bis(pinacoato)diboron* **8** were purchased from Alfa Aesar (Karlsuhe, Germany), *2-tributylstannylthiophene* **5** waspurchased from Sigma-Aldrich (Taufkirchen, Germany),*5,5'-bis(tributylstannyl)-2,2'-bithiophene* **13** was prepared according to already reported procedures.SI_[[1]](#footnote-2)

All 1H and 13C NMR spectra were recorded with a Varian Mercury 400 spectrometer operating at 400 MHz (1H). Chemical shifts were calibrated using the internal CDCl3, acetone-*d6* or CD2Cl2 resonance which were referenced to TMS. Mass spectra were collected on a ion trap Finningan Mat GCQ spectrometer operating in electron impact (EI) ionization mode. Each sample was introduced to the ion source region of GCQ via a direct exposure probe (DEP). The melting points were determined by a Bǜchi 510 apparatus.

*3-Bromothiophene-2-carboxylic acid,* **9**:To a solution of nBuLi (2.5 M, 0.055 mol, 22 ml) in dry Et2O (15 ml) at -78°C in N2 atmosphere, compound **2** (12.1 g, 0.025 mol) was added dropwise. After ten minutes from the addition of the last portion, gaseous CO2 was fluxed into the solution and the formation of a white precipitate was immediately observed. The suspension was stirred for additional 30 minutes at -78°C, then was allowed to reach room temperature. The reaction was quenched by adding distilled water (5 ml), then the aqueous phase was extracted by NaOH 10% (3x 50 ml). Subsequently, HCl 6 N was added and the precipitate formed was collected by filtration. Recrystalization from EtOH (50 ml) and H2O (200 ml) and finally, drying under vacuum furnished 9.23 g (89%) of a white powder.

M.p. 191°C, MS (70 eV, EI): m/z 208 (M**.** +1),1H NMR (acetone-d6, TMS/ppm) δ 7.85 (d, 3*J*=5.2 Hz, 1H), 7.22 (d, 3*J*=5.2 Hz, 1H). 13C NMR (acetone-d6, TMS/ppm) δ 162.6, 134.6, 133.8, 129.9, 117.6.

*Thiophene-2,3-dicarboxylic acid,* **10**: This compound was prepared according to the procedure used for the synthesis of **9**, starting from 5.18 g (0.025 mol) of **9** and30 ml (0.075 mol) of nBuLi. Recrystallization from EtOH/H2O afforded compound **10** as white powder (3.83 g, 89%).

MS (70 eV, EI): m/z 172 (M**.** +1); 1H NMR (acetone-d6, TMS/ppm) δ 7.89 (d, 3*J*=5.2 Hz, 1H), 7.71 (d, 3*J*=5.2 Hz, 1H). 13C NMR (acetone-d6, TMS/ppm) δ 167.4, 163.8, 135.6, 134.4, 133.8, 133.5.

*Thiophene-2,3-dicarboxylic anhydride,* **11**: Compound **10** (0.86 g, 5 mmol) was dissolved in 20 ml of acetic anhydride and the solution was stirred overnight at 140°C. The reaction mixture was subsequently concentrated to a pale brown solid which was recrystallized from toluene to afford compound **11** (0.60 g, 78%) as pale yellow crystals.

M.p. 147.5°C, MS (70 eV, EI): m/z 155 (M**.** +1), 1H NMR (acetone-d6, TMS/ppm) δ 8.42 (d, 3*J*=4.8 Hz, 1H), 7.57 (d, 3*J*=4.8 Hz, 1H). 13C NMR (acetone-d6, TMS/ppm) δ 159.5, 158.7, 147.4, 145.4, 143.2, 123.3.

*3-Butylcarbamoylthiophene-2-carboxylic acid,* **12** and*2-butylcarbamoylthiophene-3-carboxylic acid,* **12’**: A solution of **11** (154 mg, 1 mmol) and *n*-butylamine (77 mg, 1.05 mmol) in 15 ml of toluene was refluxed for 24 h. The crude products were collected by filtration of the cold reaction mixture. Another portion was achieved by washing the filtrate with 5% hydrochloric acid and then evaporating the solvent.

Recrystallization from toluene afforded a mixture of the titleisomers in a ratio of 90:10, in 60% yield (136 mg) as white solid which was used for cyclization without further purification.

MS (70 eV, EI): m/z 227 (M**.** -1), 1H NMR (CDCl3, TMS/ppm) δ majority isomer 7.58 (d, 3*J*=5.6 Hz, 1H), 7.30 (d, 3*J*=5.6 Hz, 1H), 6.61 (broad s, 1H), 3.50 (m, 2H), 1.65 (m, 2H), 1.42 (m, 2H), 0.98 (t, 3H). 13C NMR (CDCl3, TMS/ppm) δ majority isomer 164.9, 161.8, 134.7, 131.5, 126.6, 126.5, 40.5, 31.1, 20.1, 13.7.

*5-Butylthieno[3,2-c]pyrrole-4,6-dione,* **3:** A solution of **12** + **12’** (136 mg, 0.6 mmol) in 12 ml of thionyl chloride was refluxed for 3 h. The reaction mixture was concentrated to a yellow oil. Flash chromatography on silica gel, by using petroleum ether: CH2Cl2:AcOEt=6:2:2 afforded compound as dark yellow oil (124 mg, 99%).

MS (70 eV, EI): m/z 209 (M**.** +1), 1H NMR (CDCl3, TMS/ppm):  ~~=~~ 7.74 (d, 1 H, J = 4.8 Hz), 7.27 (d, 1 H, J = 5.2 Hz), 3.57 (t, 2H), 1.59 (m, 2H), 1.33 (m, 2H), 0.91 (t, 3H). 13C NMR (CDCl3, TMS/ppm) δ ~~=~~ 163.8, 162.7, 144.6, 140.7, 137.2, 120.9, 38.1, 30.7, 19.9, 13.5.

*2-Bromo-5-butyl-5H-thieno[3,2-c]pyrrole-4,6-dione,* **4**: Compound **3** (123 mg, 0.59 mmol) was dissolved in 4 ml of a 1:3 mixture of concentrated sulfuric acid and trifluoroacetic acid. NBS (116 mg, 0.65 mmol) was added in 3 portions over 3 hs and the reaction mixture was stirred at room temperature over night. The brown solution was then diluted with 40 ml of water and extracted with dichloromethane. The organic phase was dried over anhydrous magnesium sulfate and evaporated to afford the crude product as a brown oil. Purification by column chromatography using silica gel and petroleum ether/AcOEt (95:5) as eluent followed by recrystallization from aqueous ethanol gave 170 mg (78%) of the desired compound **4** as a off-white solid.

M.p. 61 °C; MS (70 eV, EI): m/z 289 (M**.** +1); 1H NMR (CDCl3, TMS/ppm)  ~~=~~ 7.29 (s, 1 H), 3.57 (t, 4 H), 1.6 (m, 24H), 1.33 (m, 4H), 0.92 (t, 3H). 13C NMR (CDCl3, TMS/ppm) δ 162.9, 161.9, 143.8, 140.4, 125.3, 123.7, 38.3, 30.7, 19.9, 13.6.

*5-Butyl-2-(thiophene-2-yl)-5H-thieno[3,2-c]pyrrole-4,6-dione*, **6**:To a refluxing toluene solution (6 ml) of compound **4** (101 mg, 0.35 mmol), in situ-prepared Pd(AsPh3)4 (5 mol%, i.e. 9.0 mg of Pd2dba3 and 21.4 mg of AsPh3] at 80°C under N2 atmosphere, 2-(tributylstannyl)thiophene, **5** (144 mg, 0.38 mmol) in toluene (2 ml), was added dropwise. The solution was refluxed for 2 h then the solvent was removed under vacuum and the crude product purified by flash chromatography on silica gel by using increasing amounts of EtOAc in petroleum ether as eluent. Compound **6** was obtained as bright yellow microcrystals (76 mg, 75%).

M.p. 143°C, MS (70 eV, EI): m/z 291 (M. +1), 1H NMR (CDCl3, TMS/ppm)  7.38 (dd, 3*J*=5.2 Hz, 4*J*=1.2 Hz, 1H), 7.32 (dd, 3*J*=3.6 Hz, 4*J*=1.2 Hz, 1H), 7.31 (s, 1H), 7.08 (dd, 3*J*=5.2 Hz, 3*J*=3.6 Hz, 1H), 3.60 (t, 2H), 1.63 (m, 2H), 1.36 (m, 2H), 0.94 (t, 3H). 13C NMR (CDCl3, TMS/ppm) 164.0, 162.9, 145.1, 143.3, 137.4, 135.2, 128.3, 127.2, 126.1, 116.6, 38.3, 30.8, 20.0, 13.6.

*2-(5-Bromothiophen-2-yl)-5-butyl-5H-thieno[3,2-c]pyrrole-4,6-dione,* **7:** Compound **6** (70 mg, 0.24 mmol) was dissolved in 4 ml of a 1:1 mixture of dichloromethane and acetic acid solution. NBS (43 mg, 0.24 mmol) was then added in darkness, and the reaction mixture was stirred at room temperature over night. The yellow solution was then diluted with 10 ml of water, extracted with dichloromethane, washed with 10% NaHCO3, and water. The organic phase was dried over anhydrous sodium sulfate and evaporated to afford compound **7** as a bright yellow solid (88 mg, 99%) which was used without further purification. M.p. 170°C, MS (70 eV, EI): m/z 370 (M. +1), 1H NMR (CDCl3, TMS/ppm) 7.24 (s, 1H), 7.07 (d, 3*J*=3.6 Hz, 1H), 7.04 (d, 3*J*=3.6 Hz, 1H), 3.60 (t, 2H), 1.62 (m, 2H), 1.35 (m, 2H), 0.94 (t, 3H). 13C NMR (CDCl3, TMS/ppm)  163.8, 162.7, 148.8, 145.1, 137.8, 136.5, 131.1, 126.2, 116.8, 114.4, 38.3, 30.8, 20.0, 13.6.

*2,2'-(2,2'-Bithiophene-5,5'-diyl)bis(5-butyl-5H-thieno[3,2-c]pyrrole-4,6-dione),* **T4DIM, 1**:

**One-pot MW-assisted borylation-Suzuki coupling (Scheme 1):** A mixture of **7** (37.0 mg, 0.1 mmol), bis(pinacolato)diboron **8** (15.2 mg, 0.06 mmol), PdCl2(dppf) (4.1 mg, 0.005 mmol), NaHCO3 (21.0 mg, 0.25 mmol) in THF/water 5:1 (3.6 mL) was irradiated with microwaves at 80 °C for 10 min. After cooling to room temperature, a TLC monitoring showed the absence of starting material **7**. After evaporation of the solvent in vacuo, the crude mixture was washed in pentane to remove the excess of boron, then dissolved in toluene and filtered over silica gel to remove the catalyst. Recrystallization from hot toluene gave **T4DIM,** **1** in 75% yield. M.p. 277 °C, Anal. Calcd for C28H24N2O4S4 (580.76): C, 57.91; H, 4.17. Found: C, 57.95; H, 4.20.


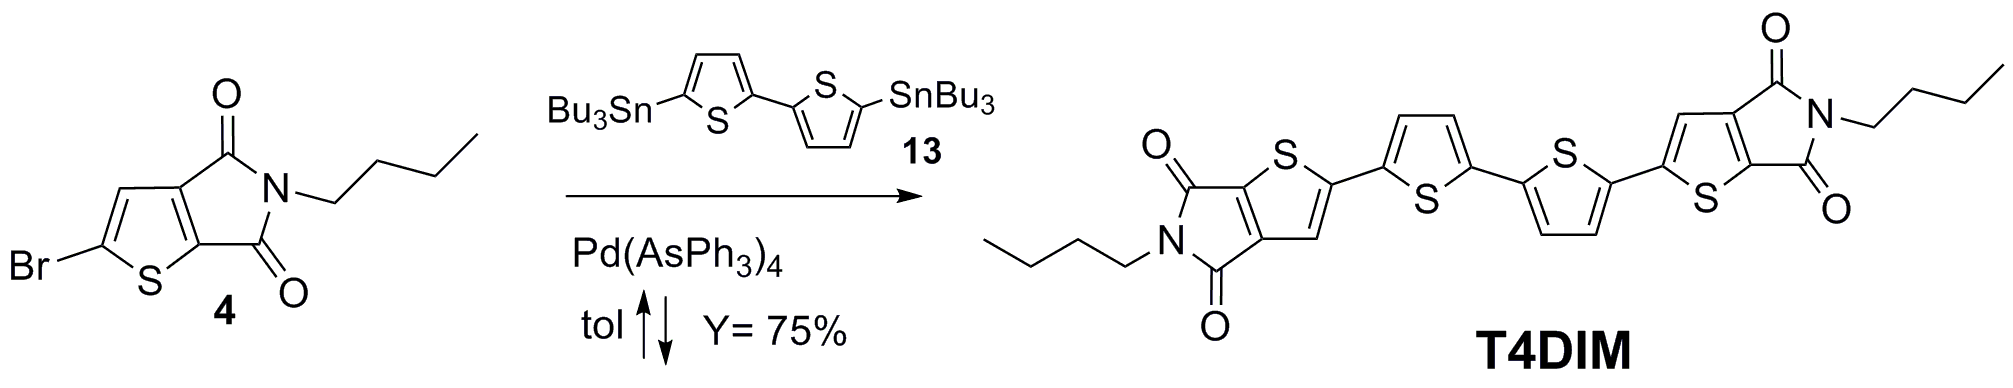


**Scheme SI_2***. Synthesis of T4DIM by Stille coupling reaction.*

*2,2'-(2,2'-Bithiophene-5,5'-diyl)bis(5-butyl-5H-thieno[3,2-c]pyrrole-4,6-dione),* **T4DIM, 1**:

**Stille coupling (Scheme SI_2):**To a refluxing toluene solution (8 ml) of compound **4** (104 mg, 0.36 mmol), in situ-prepared Pd(AsPh3)4 (6 mol%, i.e. 11.3 mg of Pd2dba3 and 26.7 mg of AsPh3] at 80°C under N2 atmosphere, 5,5'-bis(tributylstannyl)-2,2'-bithiophene **13**, (134 mg, 0.18 mmol) in toluene (2 ml), was added dropwise. The solution was refluxed for 24 h then the solvent was removed under vacuum and the crude product purified by flash chromatography on silica gel by using a solution of pet. eth./CH2Cl2 = 50: 50 pet. eth./CH2Cl2/AcOEt= 45:45:10 as the eluent. **T4DIM** was obtained as a strong red powder (76 mg, 75%) M.p. 277 °C, MS (70 eV, EI): m/z 580 (M**.** +1), absorption maximum, 449 nm, emission maximum, 570 nm in DCM; 1H NMR (CD2Cl2, TMS/ppm) 7.36 (s, 2 H), 7.32 (d, 3*J*=4.0 Hz, 2H), 7.04 (d, 3*J*=4.0 Hz, 2H), 3.60 (t, 4H), 1.63 (m, 4H), 1.36 (m, 4H), 0.96 (t, 6H). Anal. Calcd for C28H24N2O4S4 (580.76): C, 57.91; H, 4.17. Found: C, 57.99; H, 4.27.

**2. Cyclic Voltammetries (CVs)**

CVs have been performed at room temperature, after Ar purging, with an AMEL 5000 electrochemical system in CH2Cl2 (Carlo Erba RPE, distilled over anhidrous P2O5 and stored under Ar pressure) and 0.1 M (C4H9)4NClO4 (Fluka, puriss. crystallized from methanol and vacuum dried). The electrochemical cell was in three compartment shape, with Pt semi sphere electrode (diameter 2 mm), Pt wire counter electrode and aqueous KCl Saturated Calomel Electrode (SCE = 0.47 V vs. ferrocene/ferricinium).[[2]](#footnote-3)

**3. Differential scanning calorimetry (DSC)**

Differential scanning calorimetry (DSC) analysis was performed by using a Thass DSC-XP-10 instrument under atmospheric conditions.

The DSC thermogram (10°C/min) in figure SI_1 shows a first endothermic peak at T= 187°C (10.2 J/g, second heating) and a second one corresponding to the melting from crystal to liquid crystal, located at 280 °C (25.6 J/g). No more peaks were observed, independently from the scan rate.

The cooling run (not shown here), showed a single transition corresponding to the crystallization located at 272 °C (-21.4 J/g ).

**Figure SI_1***.* DSC thermogram (second heating) of **T4DIM** recordedat 10 °C/min, under ambient conditions.

**4. Hot stage polarized microscopy (POM)**

Hot stage polarized microscopy (POM) was performed by using a Nikon Eclipse 80i optical microscope with a Leika microsystem hot stage (WETZIAR GMDH). The images were recorded with a digital color camera Nikon Digital Sight DS-2Mv. Glass substrate were furnished by Knittel gläser and were washed with Acetone spectroscopic grade before use. Powder samples were sandwiched between two untreated glass plates.


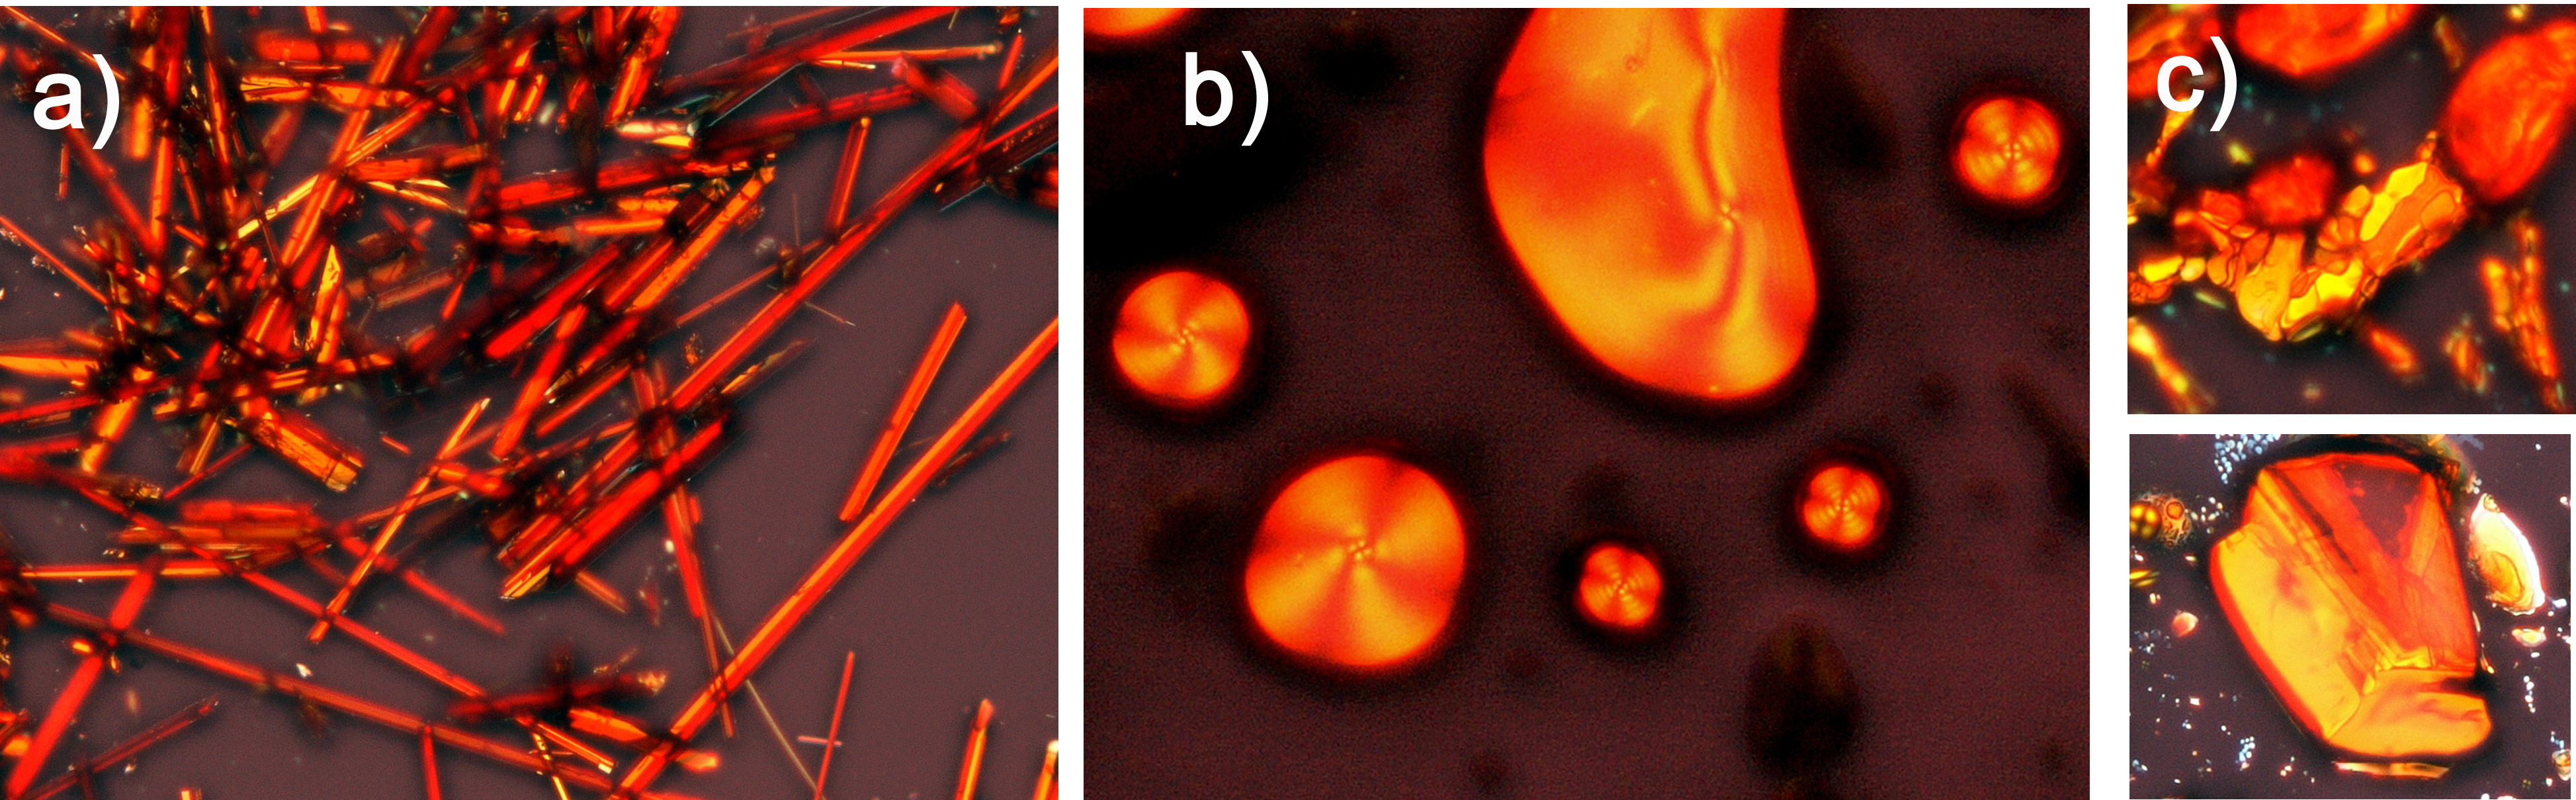


**Figure SI_2.** POM micrographs of **T4DIM** (crossed polars): (a) crystalline needles at RT; (b, c) details of the textures of the smectic phase between 280 °C and 295 °C before the transition to isotropic liquid at 295°C.

5. X-Ray Crystallography.

The X-ray intensity data for **T4DIM** were measured on a Bruker SMART Apex II CCD area detector diffractometer. Cell dimensions and the orientation matrix were initially determined from a least-squares refinement on reflections measured in three sets of 20 exposures, collected in three different  regions, and eventually refined against all data. For all crystals, a full sphere of reciprocal space was scanned by 0.3  steps. The software SMART1 was used for collecting frames of data, indexing reflections and determination of lattice parameters. The collected frames were then processed for integration by the SAINT program,1 and an empirical absorption correction was applied using SADABS.2 The structures were solved by direct methods (SIR 97)3 and subsequent Fourier syntheses and refined by full-matrix least-squares on F2 (SHELXTL),4 using anisotropic thermal parameters for all non-hydrogen atoms. The hydrogen atoms bound to carbons were located in the Fourier maps, added in calculated positions, included in the final stage of refinement with isotropic thermal parameters, *U*(H) = 1.2 *U*eq(C) [*U*(H) = 1.5 *U*eq(C-Me)], and allowed to ride on their carrier atoms. Crystal data and details for the data collection for **1** are reported in Table 1.

[1] SMART & SAINT Software Reference Manuals, version 5.051 (Windows NT Version), Bruker Analytical X-ray Instruments Inc.: Madison, Wi, 1998.

[2] Sheldrick G. M., *SADABS, program for empirical absorption correction*, University of Göttingen, Germany, 1996.

[3] Altomare A., Burla M. C.; Camalli M.; Cascarano G. L., Giacovazzo C., Guagliardi A., Moliterni A. G. G., Polidori G., Spagna R. *J. Appl. Cryst*., 1999**, 32**, 115.

[4] Sheldrick G. M., SHELXTL*plus (Windows NT Version) Structure Determination Package; Version 5.1*. Bruker Analytical X-ray Instruments Inc.: Madison, WI, USA, 1998.

Table 1. Crystal data and structure refinement for **T4DIM.**

| Compound | **T4DIM** |
| --- | --- |
| Formula | C28H24N2O4S4 |
| *M* | 580.73 |
| T, K | 293(2) |
| Crystal symmetry | Triclinic |
| Space group | *P-1* |
| *a,* Å | 4.841(4) |
| *b*, Å | 11.278(7) |
| *c,* Å | 12.907(9) |
| , ° | 71.880(9) |
| , ° | 86.80(1) |
| , ° | 86.93(1) |
| V, Å3 | 668.2(8) |
| *Z* | 1 |
| Dc, Mg m-3 | 1.443 |
| (Mo-K), mm-1 | 0.394 |
| F(000) | 302 |
| Crystal size, mm | 0.50 x 0.02 x 0.01 |
|  limits, ° | 1.66-24.00 |
| Reflections collected | 5269 |
| Unique obs. reflections [Fo > 4(Fo)] | 2053 |
| Goodness-of-fit-on F2 | 0.937 |
| R1 (F)a [Fo > 4(Fo)] | 0.0956 |
| wR2 (F2)b | 0.2337 |
| Largest diff. peak and hole, e. Å-3 | -0.448 and 1.228 |

a R1 = Fo-Fc/Fo.b wR2 = [w(Fo2-Fc2)2/w(Fo2)2]1/2 where w = 1/[2(Fo2) + (*a*P)2 + *b*P] where P = (Fo2 + Fc2)/3.

**6. Atomic Force Microscopy (AFM)**

Semiconductor thin films were fabricated by solution cast as well as vacuum sublimation of T4DIM. Thin films for surface morphology characterization have been grown by vacuum sublimation in a home-made vacuum chamber, with a deposition rate of 0.1 Å/s, at a base pressure of 10‑6 mbar. The films were formed on glass/ITO/PMMA (450 nm) supports. In particular, three films of 2 nm, 10 nm and 20 nm respectively were prepared and their morphologies investigated by means a NT-MDT Solver Pro AFM atomic force microscope in tapping mode.


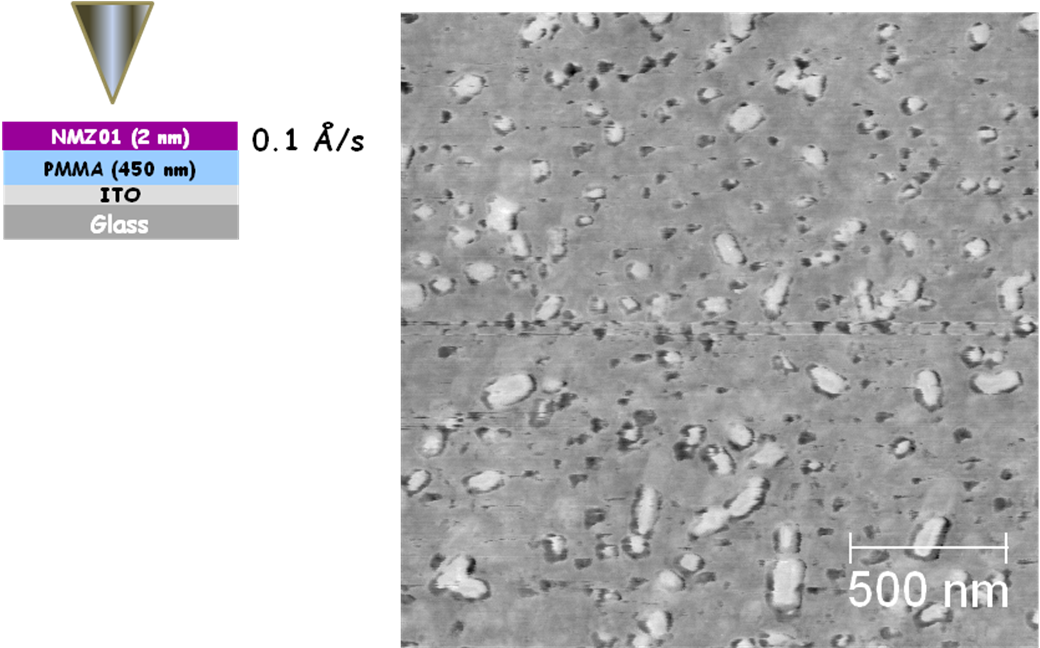

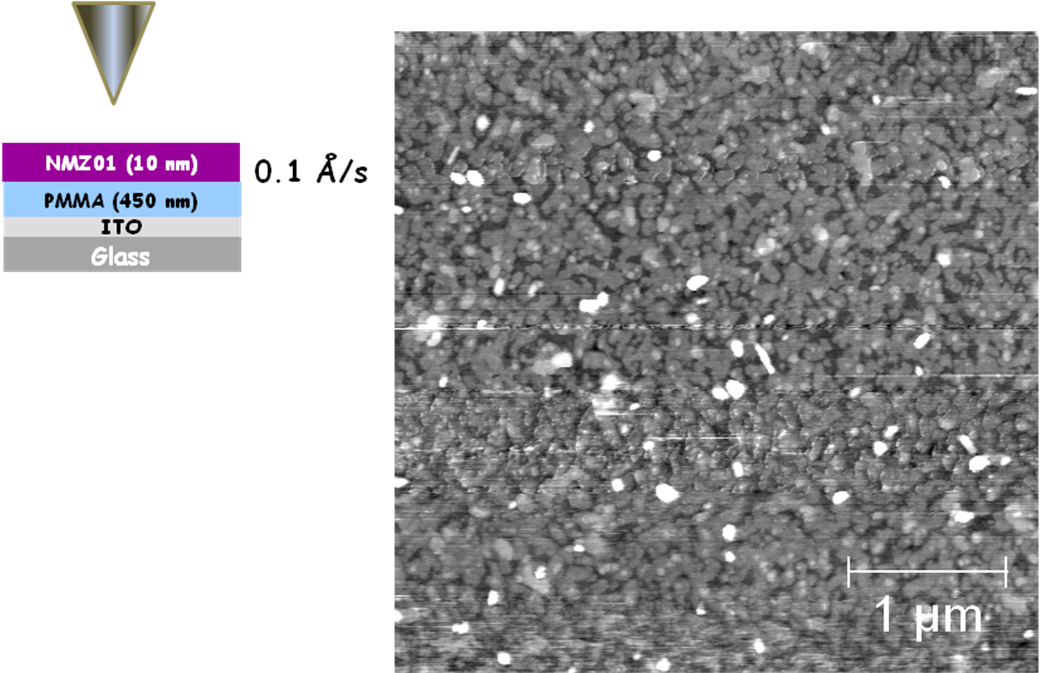

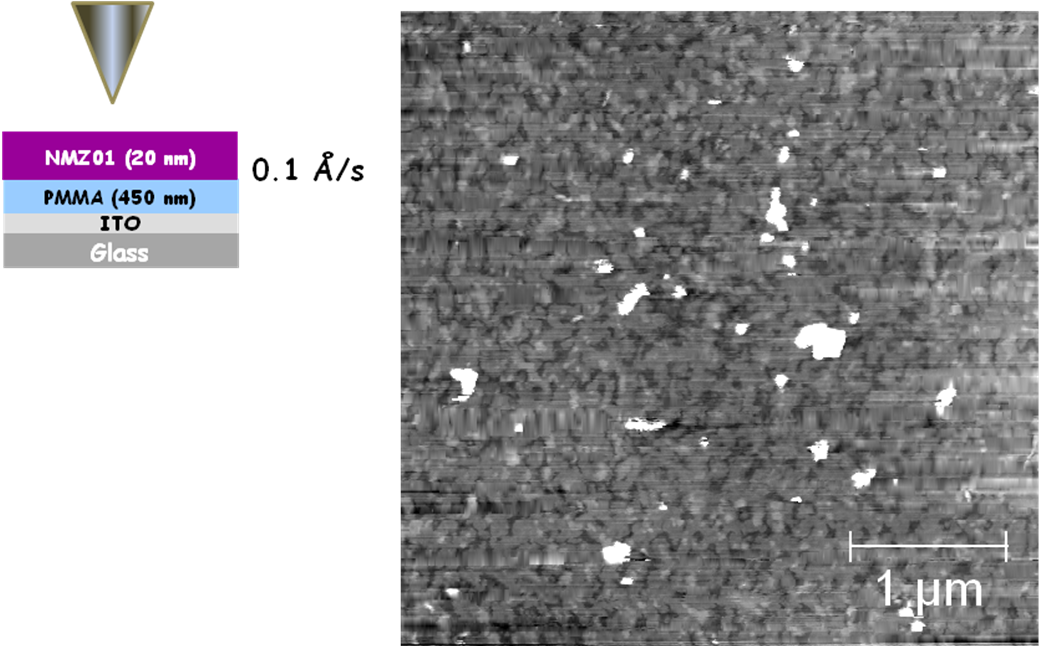


a)

b)

c)

**Figure SI_3.** AFM images of T4DIM films of different thickness grown on PMMA, a) 2 nn, b) 10 nm, c) 20 nm obtained byvacuum sublimation.

**7. Thin Film XRD**

The XRD patterns of the powder sample together with those of cast, cast-melt-quenched and vacuum sublimed films are displayed in fig. SI_4. They show several well resolved diffraction peaks confirming an important degree of crystallinity. The most intense peaks correspond to the first and second order of a periodicity of 2.46 nm. Both peaks are present either in powder or in film samples. The cast film profile shows overall the same reflections of the powder sample, suggesting the same phase and a random orientation of the crystal domains in the film. After melting at 285 °C and rapid cooling at RT, only the two peaks in the small angle region are appreciable, but at high magnification other reflections, due to higher order periodicity of the 2.46 nm distance (up to the 10th) are found. Being the molecular length about 2.8 nm and the projection on its main plane 2.6 nm, the period measured from the XRD pattern of film samples, suggests an almost perpendicular arrangement of the molecules respect to the substrate (fig. SI_4 e).


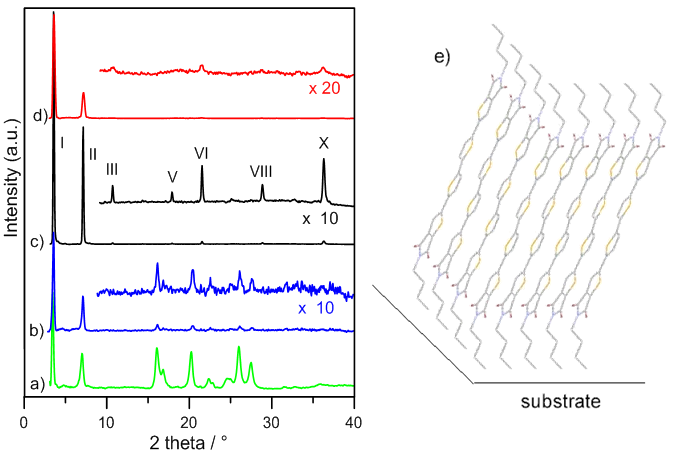


**Figure SI_4.** XRD patterns of a) the powder; b) cast film; d) cast-melt-quenched film; d) film of T4DIM sublimed in vacuum on SiO2 substrate (thickness 20 nm); e) sketch of the molecular arrangement in film samples. In roman numerals the order of the 2.46 nm periodicity.

**8. Device fabrication**

An organic thin film transistor (OTFT) was fabricated in bottom gate-top contact geometry. The ITO substrate cleaning procedure consist of two sonication cycles, in acetone first and 2-isopropanol then, for 10 minutes each. The 450 nm thick dielectric layer of PMMA has been grown by spin-coating on top of the clean ITO substrate (relative electric permittivity ε = 3.6 at 100 Hz). The PMMA film was then thermally annealed in a glove box at 120°C (around 10°C above the glass transition temperature for PMMA) for 15 hours under inert atmosphere. (CPMMA = 7.08 nF/cm2).

The 30 nm thick layer of **T4DIM** has been grown by vacuum sublimation in a home-made vacuum chamber, with a deposition rate of 0.1 Å/s, at a base pressure of 10 -6 mbar. The substrate temperature during the film deposition has been kept at room temperature (RT). The drain-source electrodes were made of gold and were evaporated through a shadow mask on top of the organic thin film. The gold layer thickness is 50 nm, while the channel length and the channel width are 70 µm and 15 mm, respectively. All opto-electronic measurements were carried out in an MBraun nitrogen glove box using a standard SUSS Probe Station equipped with a Hamamatsu photodiode for light detection.

The mobility values in saturation are calculated from the locus curves using the standard equations:

[eq. 1] µ=L/(W*C)A^2

Where A is the angular coefficient of the line fitting the square root of the drain current vs the applied voltage, L is the channel length, W the channel width and C is the transistor dielectric capacitance.

**9. Photocurrent generation test**

In Fig_SI_5 is reported a single output curve collected by switching the measurement condition from the complete dark, to the presence of a neon lamp. Each step, recognizable in the saturation portion of the curve, is correlated to the light-on measurement condition. This behavior can be described in terms of photocurrent generation.

**
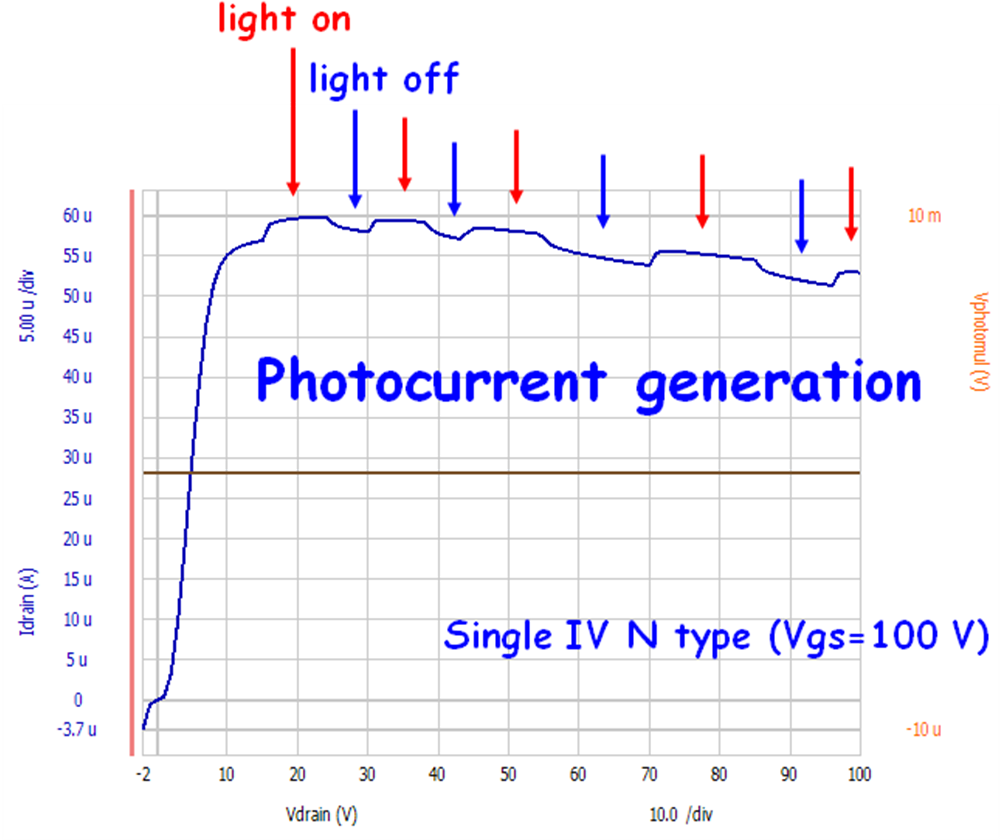
**

**Figure SI_5.**

1. SI_? J. Huang, J. Miragliotta, A. Becknell, and H. E. Katz, J. Am. Chem. Soc. 2007, 129, 9366 [↑](#footnote-ref-2)
2. SI_? C.M. Cardona, W. Li, A. E. Kaifer, D. Stockdale, G. C. Bazan *Adv. Mat.* 2011, **23**, 2247. [↑](#footnote-ref-3)
